# Supplementary material
Source: HighWire-hosted journal article supplement (https://bmjopen.bmj.com/content/9/8/e027062)
Supplement: inline-supplementary-material-1 [file inline-supplementary-material-1.pdf]

Supplement to: Zhang H, Huntley J, et al. The efficacy of Computerized Cognitive Training on cognitive outcomes in Mild Cognitive Impairment: A Systematic Review and Meta-Analysis.

**Supplementary Table 1** Search terms used for literature search

**Supplementary Table 2** Brief description of the specific outcome measures included in the meta-analysis

**Supplementary Table 3** Detailed Characteristics of studies using computerised cognitive training in persons with MCI

**Supplementary Appendix 1** Statistical methods

**Supplementary Table 1.** Search terms used for literature search

|                           |                                                                                                                                                                                                                                                                                                                                                                                                                                                                                                                                                                                                                                                                                                                                                                                                                                                                                                                                                                                                                                                                                                                                                                                                            |
|---------------------------|------------------------------------------------------------------------------------------------------------------------------------------------------------------------------------------------------------------------------------------------------------------------------------------------------------------------------------------------------------------------------------------------------------------------------------------------------------------------------------------------------------------------------------------------------------------------------------------------------------------------------------------------------------------------------------------------------------------------------------------------------------------------------------------------------------------------------------------------------------------------------------------------------------------------------------------------------------------------------------------------------------------------------------------------------------------------------------------------------------------------------------------------------------------------------------------------------------|
| <b>Intervention Terms</b> | "cognitive stimulation" OR "cognitive rehabilitation" OR "cognitive training" OR "cognitive therapy" OR "cognitive retraining" OR "cognitive support" OR "cognitive intervention" OR "cognitive exercise" OR "cognitive strategy" OR "cognitive aid" OR "memory function" OR "memory rehabilitation" OR "memory therapy" OR "memory aid" OR "memory group" OR "memory training" OR "memory retraining" OR "memory support" OR "memory stimulation" OR "memory strategy" OR "memory management" OR "brain training" OR "brain rehabilitation" OR "brain stimulation" OR "brain retraining" OR "brain exercise" OR "neuropsychological training" OR "neuropsychological therapy" OR "neuropsychological strategy" OR "neuropsychological aid" OR "neuropsychological stimulation" OR "neuropsychological rehabilitation" OR "neuropsychological exercise" OR "neuropsychological intervention" OR "neuropsychological retraining" OR "neuropsychological support" OR "psychostimulation" OR "executive training" OR "executive stimulation" OR "executive rehabilitation" OR "attention training" OR "attentional training" OR "attentional rehabilitation" OR "global stimulation" OR "reality orientation" |
| <b>Study Terms</b>        | "RCT" OR "controlled trial" OR random*                                                                                                                                                                                                                                                                                                                                                                                                                                                                                                                                                                                                                                                                                                                                                                                                                                                                                                                                                                                                                                                                                                                                                                     |
| <b>Subject Terms</b>      | "Mild cognitive impairment" OR "memory impairment" OR "cognitive impairment" OR "memory disorder" OR "cognitive disorder" OR "memory dysfunction" OR "cognitive dysfunction" OR "MCI" OR "AAMI" OR "MCD" OR "mild cognitive disorder"                                                                                                                                                                                                                                                                                                                                                                                                                                                                                                                                                                                                                                                                                                                                                                                                                                                                                                                                                                      |

**Supplementary Table 2.** Brief description of the specific outcome measures included in the meta-analysis

| Outcome measure                                              | Domain  | Brief Description                                                                                                                                                                                                              | Study                                                                                                                                                       |
|--------------------------------------------------------------|---------|--------------------------------------------------------------------------------------------------------------------------------------------------------------------------------------------------------------------------------|-------------------------------------------------------------------------------------------------------------------------------------------------------------|
| Mini Mental State Examination (MMSE)                         | GEN COG | A 30-point questionnaire used to estimate severity of cognitive impairment including orientation and memory functions                                                                                                          | Barben et al, 2016<br>Ciarmiello et al. 2015<br>Djabekhir et al 2017<br>Han et al 2017<br>Hagovska et al. 2015<br>Rozzini et al 2007<br>Savulich et al 2017 |
| Modified Mini Mental State Examination (mMMSE)               | GEN COG | This instrument included all items from the standard MMSE, plus the Wechsler Adult Intelligence Scale–Revised Digit Span subtest and additional attention/calculation and general knowledge, language, and construction items. | Gooding et al 2016 study 1&2                                                                                                                                |
| Alzheimer’s Disease Assessment Scale-Cognitive (ADAS-Cog)    | GEN COG | Measuring severity of cognitive dysfunction associated with Alzheimer’s disease, and is widely used in pharmacological studies of dementia and MCI. Higher scores indicate more dysfunction.                                   | Fiatarone Singh et al 2014                                                                                                                                  |
| Computerised Assessment of Mild Cognitive Impairment (CAMCI) | GEN COG | A battery of tests to assess cognitive performance including domains of attention, executive functioning, memory and processing speed                                                                                          | Hughes et al 2014                                                                                                                                           |
| Milan Overall Dementia Assessment (MODA)                     | GEN COG | The MODA is a paper and pencil test, composed of three sections: an autonomy scale, a section testing orientation and a section testing a wide range of cognitive domains.                                                     | Ciarmiello et al. 2015                                                                                                                                      |
| 16-item free and cued reminding test                         | MEM     | Participants search a card containing four pictures of items with matched category cues before subjected to tests of free and cued recall                                                                                      | Herrera et al 2012<br>Djabekhir et al 2017                                                                                                                  |
| BEM-144 recall test                                          | MEM     | A 12-word immediate recall test from BEM-144 memory battery                                                                                                                                                                    | Herrera et al 2012                                                                                                                                          |
| Description of the visual recognition memory task (DMS48)    | MEM     | Participants asked to remember a sample before making a delayed forced-choice match to original sample                                                                                                                         | Herrera et al 2012<br>Ciarmiello et al. 2015                                                                                                                |

| Outcome measure                                                                               | Domain | Brief Description                                                                                                                                                                                                                                                                                   | Study                                                               |
|-----------------------------------------------------------------------------------------------|--------|-----------------------------------------------------------------------------------------------------------------------------------------------------------------------------------------------------------------------------------------------------------------------------------------------------|---------------------------------------------------------------------|
| Doors Recognition subtest                                                                     | MEM    | Participants are shown a variety of different coloured doors which they must remember and later recognise from a selection of similar doors                                                                                                                                                         | Herrera et al 2012                                                  |
| MMSE - Recall Test                                                                            | MEM    | Participants presented with stimuli before being asked to recall as many as possible                                                                                                                                                                                                                | Herrera et al 2012                                                  |
| Paired-associates learning (PAL)                                                              | MEM    | Visual patterns revealed in different boxes before participant tested on where pattern originally located                                                                                                                                                                                           | Finn & McDonald 2011<br>Finn & McDonald 2015<br>Savulich et al 2017 |
| Pattern Recognition Memory (PRM)                                                              | MEM    | Test of visual pattern recognition in a forced discrimination paradigm                                                                                                                                                                                                                              | Finn & McDonald 2011                                                |
| Recall of Rey's Complex Figure                                                                | MEM    | Subjects shown complex figure and then tested on their delayed recall of the figure                                                                                                                                                                                                                 | Herrera et al 2012<br>Rozzini et al 2007                            |
| Rey's figure copy                                                                             | MEM    | Participants are to reproduce a drawing by i) copying (reproduction) and ii) memory (recall) using a 18-point scoring system                                                                                                                                                                        | Rozzini et al 2007                                                  |
| List Learning Memory Sum from ADAS-Cog                                                        | MEM    | List learning assessed across the three memory recall trials of the ADAS-Cog. Higher scores indicate better memory.                                                                                                                                                                                 | Fiatarone Singh et al 2014                                          |
| Benton Visual Retention Test-Revised (BVRT-R)                                                 | MEM    | BVRT-R is a visual memory test which assesses visual perception and visual constructional abilities as participants are required to draw from memory simple designs. Higher scores indicate better function.                                                                                        | Fiatarone Singh et al 2014<br>Savulich et al 2017                   |
| The Logical Memory subtest of the Wechsler Memory Scale 3rd edition (immediately and delayed) | MEM    | The logic memory is used to measure both immediate (I) and delayed (II) memory for verbal information. Participants are presented with a simple narrative and are required to recall as many details of the story as they can immediately after presentation. Higher scores indicate better memory. | Fiatarone Singh et al 2014                                          |
| Rey Auditory Verbal Learning Test (RAVLT)                                                     | MEM    | RAVLT includes a list of 15 words to be recalled immediately after each of the 5 verbal presentations and after a 30-min delay                                                                                                                                                                      | Barben et al, 2016<br>Ciarmiello et al. 2015                        |
| Prose memory                                                                                  | MEM    | A subset of The Memory Assessment Scales, is an auditory verbal prose recall task which requires the subject to recall a short story. Subjects are asked to recall the story from memory and are then asked nine questions about details of the story.                                              | Ciarmiello et al. 2015                                              |

| Outcome measure                                     | Domain | Brief Description                                                                                                                                                                                                                                                                                                                                                                                                    | Study                        |
|-----------------------------------------------------|--------|----------------------------------------------------------------------------------------------------------------------------------------------------------------------------------------------------------------------------------------------------------------------------------------------------------------------------------------------------------------------------------------------------------------------|------------------------------|
| visuospatial memory test (VST)                      | MEM    | From the Cognitive Efficiency Profile                                                                                                                                                                                                                                                                                                                                                                                | Djabekhir et al 2017         |
| Buschke Selective Reminding Test (BSRT)             | MEM    | The test provides 12 words which are selectively rehearsed by the subject until they are memorized. That is, only those words not recalled on the immediately preceding trial are presented. The subject then attends to an interference task or verbal list. Subsequently, after a delay, the subject is asked to recall the words.                                                                                 | Gooding et al 2016 study 1&2 |
| WMS-R Visual Reproductions (VR) I and II subtests   | MEM    | VR assesses visual memory. Cards with printed designs is shown to the participants. Following each exposure and a 30 minutes delay, subjects draw what they remember of the design.                                                                                                                                                                                                                                  | Gooding et al 2016 study 1&2 |
| WMS-R Logical Memory (LM)Subtests I and II subtests | MEM    | LM. The examiner reads two stories, stopping after each reading for an immediate free recall. And a 30 minutes delayed recall.                                                                                                                                                                                                                                                                                       | Gooding et al 2016 study 1&2 |
| Short Story                                         | MEM    | Participants are asked to recall a short story                                                                                                                                                                                                                                                                                                                                                                       | Rozzini et al 2007           |
| The Word List Memory Test (WLMT)                    | MEM    | Word list task that contains 10 semantically unrelated words The words are presented to the subject one at a time and are read aloud Three trials are administered in this fashion, with the order of the 10 words being randomized for each trial The examiner records the order of recall and notes any intrusions that might occur The primary Indices of Interest are the number of words recalled on each trial | Han et al 2017               |
| The Word List Recall Test (WLRT)                    | MEM    | Words, displayed one at a time for one second each. Participants read each of the words, and try to remember them without taking notes.                                                                                                                                                                                                                                                                              | Han et al 2017               |
| WLRcT(The Word List Recognition)                    | MEM    | A word list was designed so that half its words would denote targets when any of a number of target classes were defined. After scanning this list for targets, subjects were unexpectedly tested on their ability to recognize the words they had scanned.                                                                                                                                                          | Han et al 2017               |

| Outcome measure                | Domain | Brief Description                                                                                                                                                                                                                                                                                                                                                                                                                                                                                    | Study                                       |
|--------------------------------|--------|------------------------------------------------------------------------------------------------------------------------------------------------------------------------------------------------------------------------------------------------------------------------------------------------------------------------------------------------------------------------------------------------------------------------------------------------------------------------------------------------------|---------------------------------------------|
| RBANS Memory Score             | MEM    | It consists of 12 subtests, which yield five Index scores (i.e., Attention, Language, Visuospatial/Constructional, Immediate Memory, and Delayed Memory) and a Total Scale score.                                                                                                                                                                                                                                                                                                                    | Rosen et al 2011                            |
| Dot counting test              | WM     | The task dot counting requires examinees to count the dots as quickly as possible by the fastest means possible.                                                                                                                                                                                                                                                                                                                                                                                     | Lin et al 2016                              |
| 1-back test                    | WM     | In the 1-Back task, participants are presented a sequence of stimuli one-by-one. For each stimulus, they need to decide if the current stimulus is the same as the one presented 1 trials ago.                                                                                                                                                                                                                                                                                                       | Lin et al 2016                              |
| Digit Span Test                | WM     | Sequence of digits is read aloud. Subjects asked to immediately recall digits in the correct order. If correct, a sequence with an additional digit is presented.                                                                                                                                                                                                                                                                                                                                    | Herrera et al 2012<br>Ciarmiello et al 2015 |
| LNS (Letter-Number Sequencing) | WM     | The task involves listening to and remembering a string of digits and letters read aloud at a speed of one per second, then recalling the information by repeating the numbers in chronological order, followed by the letters in alphabetical order.                                                                                                                                                                                                                                                | Hyer et al 2016                             |
| Spatial Span                   | WM     | Participants tested on ability to remember the location of objects on a spatial grid.                                                                                                                                                                                                                                                                                                                                                                                                                | Hyer et al 2016                             |
| Spatial Span (Corsi test)      | WM     | Corsi is a short term memory task conceptually similar to the digit span test. the experimenter (the person who carries out the study) shows nine blocks arranged in front of the participant, the experimenter taps a sequence of blocks (for example, the experimenter taps a sequence of 3 different blocks, one after another), the participant needs to tap the blocks that the experimenter showed, in the same order, steps 1-3 are repeated multiple times with different lengths of blocks. | Ciarmiello et al. 2015                      |
| Spatial working memory (SWM)   | WM     | A test that requires retention and manipulation of visuospatial information to collect 'tokens' and fill a column                                                                                                                                                                                                                                                                                                                                                                                    | Finn & McDonald 2011                        |

| Outcome measure                             | Domain | Brief Description                                                                                                                                                                                                                                                                                                                                                                                                                                                                    | Study                                                                              |
|---------------------------------------------|--------|--------------------------------------------------------------------------------------------------------------------------------------------------------------------------------------------------------------------------------------------------------------------------------------------------------------------------------------------------------------------------------------------------------------------------------------------------------------------------------------|------------------------------------------------------------------------------------|
| Symbol Span                                 | WM     | This subtest assesses visual working memory using novel visual stimuli. Beginning with two symbols, abstract visual symbols are exposed for 5 seconds. In the test phase, the participant has to correctly recall not only the correct symbols from distractor items, but also the order in which they were presented from left to right. The number of symbols presented increases by one at intervals as the test progresses. Higher scores indicate better visual working memory. | Finn & McDonald et al 2015                                                         |
| Word span                                   | WM     | Participants tested on ability to remember a list of words in order.                                                                                                                                                                                                                                                                                                                                                                                                                 | Ciarmiello et al. 2015                                                             |
| Alpha span task                             | WM     | In the alpha span test, short lists of words are presented and the participant's task is to mentally reorder the words and give them back in correct alphabetical order.                                                                                                                                                                                                                                                                                                             | Ciarmiello et al. 2015                                                             |
| Intra-/extra-dimensional set shifting (IED) | EXE    | A test of rule acquisition and reversal. It is computerised analogue of the Wisconsin Card Sorting test and measured the total errors made                                                                                                                                                                                                                                                                                                                                           | Finn & McDonald 2011                                                               |
| Modified Dual Task                          | EXE    | Participants completed a modified dual task consisting of a visual detection task (responding to an appearance of a stimuli) and alpha-arithmetic task (responding 'true' or 'false' to equations of letters and numbers e.g. 'U-1 = T') simultaneously and were recorded in accuracy of responses in each task                                                                                                                                                                      | Gagnon & Belleville 2012                                                           |
| Raven's coloured matrices                   | EXE    | 60 patterns present in order of difficulty. Subjects asked to identify the missing element that completes a pattern.                                                                                                                                                                                                                                                                                                                                                                 | Rozzini et al 2007                                                                 |
| Telephone Search Dual Task                  | EXE    | Participants complete the telephone search test whilst simultaneously counting audible tones.                                                                                                                                                                                                                                                                                                                                                                                        | Gagnon & Belleville 2012                                                           |
| Telephone Search Test                       | EXE    | Participants circle key stimuli while searching entries in a simulated classified telephone directory.                                                                                                                                                                                                                                                                                                                                                                               | Gagnon & Belleville 2012                                                           |
| Trial making test                           | EXE    | The task requires participants to 'connect the dots' in two parts, firstly numerically and secondly, alphanumerically.                                                                                                                                                                                                                                                                                                                                                               | Gagnon & Belleville 2012, Hughes et al 2014, Djabelkhir et al 2017 Hyer et al 2016 |

| Outcome measure                                       | Domain | Brief Description                                                                                                                                                                                                                                                                                                                                                                          | Study                                               |
|-------------------------------------------------------|--------|--------------------------------------------------------------------------------------------------------------------------------------------------------------------------------------------------------------------------------------------------------------------------------------------------------------------------------------------------------------------------------------------|-----------------------------------------------------|
| Verbal fluency                                        | EXE    | Participants generate as many words in one minute from a given letter.                                                                                                                                                                                                                                                                                                                     | Rozzini et al 2007, Djabelkhir et al 2017           |
| Visual Elevator Test                                  | EXE    | Participants count up and down according to visual stimuli in an elevator, the time-per-direction-change score was calculated.                                                                                                                                                                                                                                                             | Gagnon & Belleville 2012                            |
| Raven's progressive matrices - non-verbal test (PM47) | EXE    | The Raven Standard Progressive Matrices (PM47) assess the measure the test taker's reasoning ability.                                                                                                                                                                                                                                                                                      | Ciarmiello et al. 2015                              |
| Rey–Osterrieth complex figure test (ROCF)             | EXE    | ROCF is a neuropsychological assessment in which examinees are asked to reproduce a complicated line drawing, first by copying it freehand (recognition), and then drawing from memory (recall). The test therefore permits the evaluation of different functions, such as such as visuospatial abilities, memory, attention, planning, working memory and executive functions.            | Ciarmiello et al. 2015                              |
| Categorical verbal fluency (animals)                  | EXE    | Participants generate as many animal names as possible in one minute.                                                                                                                                                                                                                                                                                                                      | Fiatarone Singh et al 2014<br>Djabelkhir et al 2017 |
| Number sequencing<br>Number-Letter switching          | EXE    | In Number Sequencing, the participant is asked to draw a line connecting numbers in order from low to high as quickly as possible without making mistakes, and is a measure of attention. In Number-Letter switching, the task is to switch between connecting numbers and letters, in order, from lowest to highest, e.g., 1-A, 2-B, 3-C etc., and is a measure of cognitive flexibility. | Finn & McDonald et al 2015                          |
| Tracking A, Tracking B                                | EXE    | Two tracking tasks requiring participants to (1) track numbers (from 24-1) in reverse order (Tracking A), and (2) months forward (January – December) and numbers in reverse (Tracking B).                                                                                                                                                                                                 | Hughes et al 2014                                   |
| Useful field of view (UFOV)                           | EXE    | UFOV is a computerized test assessing visual processing speed and attention.                                                                                                                                                                                                                                                                                                               | Lin et al 2016                                      |
| Verbal fluency                                        | EXE    | Phonemic and categorical fluency                                                                                                                                                                                                                                                                                                                                                           | Lin et al 2016                                      |
| Cognitive control                                     | EXE    | Set shifting and flanker tasks                                                                                                                                                                                                                                                                                                                                                             | Lin et al 2016                                      |

| Outcome measure                    | Domain | Brief Description                                                                                                                                                                                                                                                                                                                                                                                        | Study                      |
|------------------------------------|--------|----------------------------------------------------------------------------------------------------------------------------------------------------------------------------------------------------------------------------------------------------------------------------------------------------------------------------------------------------------------------------------------------------------|----------------------------|
| Cross-modality dual task (Divided) | EXE    | Participants were subjected to a dual-task simultaneously consisting of a visual detection (as above) with a digit span task (orally recalling a list of digits) and recorded span items recalled correctly in %.                                                                                                                                                                                        | Gagnon & Belleville 2012   |
| The CANTAB CRT(speed)              | EXE    | It is used to assess motor speed and thus acts as a control measure of general alertness to help interpret other cognitive tasks. An arrow will appear on either the left or right side of a computer screen. After the arrow appears, the participant is instructed to press a corresponding left or right button, using a response box, as quickly as possible.                                        | Savulich et al 2017        |
| WAIS-III Similarities              | EXE    | WAIS Similarities is a subtest from the WAIS-III used to measure verbal conception formation and abstractive thinking. Higher scores indicate better function.                                                                                                                                                                                                                                           | Fiatarone Singh et al 2014 |
| WAIS-III Matrices                  | EXE    | WAIS Matrices is a perceptual subtest of the Wechsler Adult Intelligence Scale–III and is used to assess executive functions posing four types of non-verbal reasoning tasks including pattern completion, classification, abstraction and serial reasoning, and all items require visual perception, organization, and synthesis of visual spatial information. Higher scores indicate better function. | Fiatarone Singh et al 2014 |
| COWAT                              | EXE    | Combined Oral Word Association Test is a language-based task assessing association fluency, and is often used as a measure of executive functioning. The most commonly used letters are F, A, and S. or C, F, and L, based upon word prevalence rates. Higher scores indicate better function.                                                                                                           | Fiatarone Singh et al 2014 |
| SDMT (Attention/speed)             | EXE    | Symbol Digit Modalities Test measures divided attention, visual scanning, tracking, and motor speed. It uses a substitution format presenting symbols with matching numbers, and participants are required to provide name the numbers corresponding to each given symbol. Higher scores indicate better function.                                                                                       | Fiatarone Singh et al 2014 |

Notes: General cognition (GEN COG), episodic memory (MEM), working memory (WM), executive function (EXE)

**Supplementary Table 3.** Detailed Characteristics of studies using computerised cognitive training in persons with MCI

| Author and Year     | Treatment Group N, % male, mean age, mean education, MMSE (SD)                       | Control Group N, ratio of male, mean age, mean education, MMSE (SD)                   | CCT type for EC and type of CC                                           | Frequency, duration and total hours                                       | Drop-out (%)                  | Cognitive Training Intervention                                                                                                                                                                                | Assessment interval (time pre or post intervention) | Include d for meta-analysis |
|---------------------|--------------------------------------------------------------------------------------|---------------------------------------------------------------------------------------|--------------------------------------------------------------------------|---------------------------------------------------------------------------|-------------------------------|----------------------------------------------------------------------------------------------------------------------------------------------------------------------------------------------------------------|-----------------------------------------------------|-----------------------------|
| Barban et al 2016   | N = 46<br>Ratio = 54.3%<br>Age = 74.4 (5.7)<br>Edu = 9 (4.3)<br>MMSE = 27.3 (2.1)    | N = 60<br>Ratio = 51.7%<br>Age = 72.9 (6.0)<br>Edu = 11 (4.7)<br>MMSE = 28.1 (1.4)    | EC: multi domain training.<br>CC: passive(rest)                          | 60 minute sessions, 2 sessions per week for 3 months.<br>Total = 24 hours | n/s                           | Computerised software: 'SOCIALE' using touch screen. Multi-component - CT including Memory, attentional Executive Function, orientation, logical reasoning, constructional Praxis, language.                   | Before and after training, follow-up (n/s)          | Yes                         |
| Chandler et al 2017 | N = 27<br>Ratio = 73.3%<br>Age = 77.4 (7.2)<br>Edu = 16.2 (2.6)<br>MMSE = 26.7 (3.0) | N = 30<br>Ratio = 50.0 %<br>Age = 76.2 (7.0)<br>Edu = 16.0 (2.4)<br>MMSE = 25.8 (3.2) | EC: Auditory memory training<br>CC: Active( Memory Support System (MSS)) | Frequency: n/s<br>Duration: n/s<br>Total = 10 hours                       | EC:4<br>CC:3<br>Total:10.94 % | "Auditory Brain Training" software: 6 adaptive modules exercises to recognize and differentiate sounds, match or repeat sounds, remember increasingly difficult directions, and remember details from stories. | n/s                                                 | No*                         |

| Author and Year              | Treatment Group N, % male, mean age, mean education, MMSE (SD)                                          | Control Group N, ratio of male, mean age, mean education, MMSE (SD)                                     | CCT type for EC and type of CC                                                | Frequency, duration and total hours                                         | Drop-out (%)                  | Cognitive Training Intervention                                                                                                                                                                   | Assessment interval (time pre or post intervention)                                | Include d for meta-analysis |
|------------------------------|---------------------------------------------------------------------------------------------------------|---------------------------------------------------------------------------------------------------------|-------------------------------------------------------------------------------|-----------------------------------------------------------------------------|-------------------------------|---------------------------------------------------------------------------------------------------------------------------------------------------------------------------------------------------|------------------------------------------------------------------------------------|-----------------------------|
| <b>Ciarmiello et al 2015</b> | N = 15<br>Ratio = 35.7%<br>Age = 71.2 (7.7)<br>Edu = 9.3 (3.02)<br>MMSE = 27.9 (1.8)                    | N = 15<br>Ratio = 46.7%<br>Age = 72.0 (7.1)<br>Edu = 7.8 (2.6)<br>MMSE = 27.8(1.9)                      | EC: multi domain<br>CC: semi-active (meeting with psychologist – no computer) | 45 minute sessions, 2 days per week for 4 months.<br>Total = 24 hours.      | EC: 0<br>CC: 0<br>0%          | Computerised training with multiple difficulty levels. Includes dual-task training, executive function training, working memory updating, visual exploration, spatial orienting tasks.            | Before and after training follow-up (n/s)                                          | Yes                         |
| <b>Djabekhjir et al 2017</b> | N = 10<br>Ratio = 30.0 %<br>Age = 75.2 (6.4)<br>Edu = 60.0% (6) (of college level)<br>MMSE = 27.7 (1.9) | N = 10<br>Ratio = 40.0 %<br>Age = 78.2 (7.0)<br>Edu = 44.4% (4) (of college level)<br>MMSE = 27.4 (2.0) | EC: multi-domain<br>CC: Active(multi-component)                               | 90 mins per session<br>1 sessions/week, 12 weeks.<br>Total = 18 hours.      | EC: 1<br>CC: 0<br>Total: 5%   | ‘KODRO’ (Altera-Group, Paris, France), a web-based platform with several applications (ie, appointment and event reminding, cognitive games, communication, entertainment, videos and a library). | Before and after training. Follow-up (n/s)                                         | Yes                         |
| <b>Fiatarone et al. 2014</b> | N = 24<br>Ratio = n/s<br>Age = >55<br>Edu = n/s<br>MMSE = 28.0 (2.0)                                    | N = 27<br>Ratio = n/s<br>Age = >55<br>Edu = n/s<br>MMSE = 27.0 (2.0)                                    | EC: multi domain<br>CC: active (sham)                                         | 75 minute sessions, 2 or 3 days per week for 26 weeks.<br>Total = 80 hours. | EC: 2<br>CC: 3<br>Total: 9.8% | COGPack program: Computer-based multimodal and multi domain exercises targeting memory, executive function, attention, and speed of information processing                                        | At baseline and 6 months and at least 72 hours after the previous training session | Yes                         |

| Author and Year                 | Treatment Group N, % male, mean age, mean education, MMSE (SD)                      | Control Group N, ratio of male, mean age, mean education, MMSE (SD)                 | CCT type for EC and type of CC                 | Frequency, duration and total hours                                                        | Drop-out (%)                   | Cognitive Training Intervention                                                                                                      | Assessment interval (time pre or post intervention) | Include d for meta-analysis |
|---------------------------------|-------------------------------------------------------------------------------------|-------------------------------------------------------------------------------------|------------------------------------------------|--------------------------------------------------------------------------------------------|--------------------------------|--------------------------------------------------------------------------------------------------------------------------------------|-----------------------------------------------------|-----------------------------|
|                                 |                                                                                     |                                                                                     |                                                |                                                                                            |                                |                                                                                                                                      | Follow-up: at 18 months                             |                             |
| <b>Finn &amp; McDonald 2011</b> | N = 8<br>ratio = 37.5%<br>age = 69.0 (7.7)<br>Edu = 13.3 (2.2)<br>MMSE = 28.5 (2.3) | N = 8<br>ratio = 62.5%<br>age = 76.4 (6.5)<br>Edu = 12.0 (2.8)<br>MMSE = 27.5 (2.4) | EC: Multi-domain<br>CC: Waiting list (Passive) | 30 minute sessions, 4-5 sessions a week for an average of 11.43 weeks.<br>Total = 25 hours | EC: 4<br>CC: 5<br>Total: 32%   | Lumosity Inc CCT package.<br>Four broad cognitive domains targeted: attention, processing speed, visual memory and cognitive control | Before and after training<br>Follow-up (n/s)        | Yes                         |
| <b>Finn &amp; McDonald 2015</b> | N = 12<br>ratio = 66%<br>age = 72.8 (5.7)<br>Edu = 13.8 (3.0)<br>MMSE = 27.8 (1.3)  | N = 12<br>ratio = 75%<br>age = 75.1 (7.5)<br>Edu = 13.7 (2.8)<br>MMSE = 27.8 (1.9)  | EC: Single memory domain<br>CC: Passive        | 2 sessions per week for 4 weeks<br>Total = n/s                                             | EC: 4<br>CC: 3<br>Total: 22.6% | Repetition-lag training to improve recollection memory                                                                               | First and last training session<br>Follow-up (n/s)  | Yes                         |

| Author and Year                     | Treatment Group N, % male, mean age, mean education, MMSE (SD)                     | Control Group N, ratio of male, mean age, mean education, MMSE (SD)                | CCT type for EC and type of CC                       | Frequency, duration and total hours                                         | Drop-out (%)                    | Cognitive Training Intervention                                                                                                     | Assessment interval (time pre or post intervention)    | Include d for meta-analysis |
|-------------------------------------|------------------------------------------------------------------------------------|------------------------------------------------------------------------------------|------------------------------------------------------|-----------------------------------------------------------------------------|---------------------------------|-------------------------------------------------------------------------------------------------------------------------------------|--------------------------------------------------------|-----------------------------|
| <b>Gagnon &amp; Belleville 2012</b> | N = 12<br>ratio = n/s<br>age = 67.0 (7.8)<br>Edu = 15.0 (4.6)<br>MMSE = 28.1 (1.2) | N = 12<br>ratio = n/s<br>age = 68.4 (6.0)<br>Edu = 13.1 (5.7)<br>MMSE = 27.8 (1.5) | EC: Single domain(attentional control)<br>CC: Active | 60 minute sessions, 3 times a week for 2 weeks.<br>Total = 6 hours          | EC: 1<br>CC: 1<br>Total: 8%     | Programme targeting attentional control using Variable Priority (VP) training in a dual task with selected priorities and feedback. | One week pre and after intervention<br>Follow-up (n/s) | Yes                         |
| <b>Gooding et al 2016 study 1</b>   | N = 31<br>ratio = 58.1%<br>age = 75.6 (8.8)<br>Edu = 15.1 (2.6)<br>MMSE = n/s      | N = 10<br>ratio = 58.1%<br>age = 75.6 (8.8)<br>Edu = 15.1 (2.6)<br>MMSE = n/s      | EC: Multi-domain<br>CC: Active                       | 60 min sessions, two days per week for 16 weeks<br>Total = approx. 30 hours | EC: 12<br>CC: 1<br>Total: 20.3% | Posit Science's BrainFitness – repeated drill-and-practice adaptive exercises involving memory, attention and executive functions.  | Before and after training<br>Follow-up (n/s)           | Yes                         |
| <b>Gooding et al 2016 study 2</b>   | N = 23<br>ratio = 58.1%<br>age = 75.6 (8.8)<br>Edu = 15.1 (2.6)<br>MMSE = n/s      | N = 10<br>ratio = 58.1%<br>age = 75.6 (8.8)<br>Edu = 15.1 (2.6)<br>MMSE = n/s      | EC: Multi-domain<br>CC: Active                       | 60 min sessions, two days per week for 16 weeks<br>Total = approx. 30 hours | EC: 12<br>CC: 1<br>Total: 20.3% | Posit Science's BrainFitness – repeated drill-and-practice adaptive exercises involving memory, attention and executive functions.  | Before and after training<br>Follow-up (n/s)           | Yes                         |

| Author and Year     | Treatment Group N, % male, mean age, mean education, MMSE (SD)                                          | Control Group N, ratio of male, mean age, mean education, MMSE (SD)                                     | CCT type for EC and type of CC                                             | Frequency, duration and total hours                                                  | Drop-out (%)                  | Cognitive Training Intervention                                                                                                                                                  | Assessment interval (time pre or post intervention) | Include d for meta-analysis |
|---------------------|---------------------------------------------------------------------------------------------------------|---------------------------------------------------------------------------------------------------------|----------------------------------------------------------------------------|--------------------------------------------------------------------------------------|-------------------------------|----------------------------------------------------------------------------------------------------------------------------------------------------------------------------------|-----------------------------------------------------|-----------------------------|
| Hagovska et al 2016 | N = 40<br>ratio = 55%<br>age = 68.0 (4.4)<br>Edu = 75% of secondary education<br>MMSE = 26.0 (2.6)      | N = 40<br>ratio = 48%<br>age = 65.9 (6.2)<br>Edu = 70% of secondary education<br>MMSE = 26.0 (1.5)      | EC: Multi domain + balance training<br>CC: Passive( just balance training) | 30 minute sessions, 2 times a week for 10 weeks.<br>Total = 10 hours                 | EC: 0<br>CC: 2<br>Total: 2.5% | CogniPlus training program<br>Battery contains subprograms for attention, Working Memory, long-term memory, executive functions, spatial processing and visuomotor coordination. | Before and after training<br>Follow-up (n/s)        | Yes                         |
| Han et al 2017      | N = 23<br>Ratio = 56.5%<br>Age = 73.7 (4.8)<br>Edu = 13.5 (3.2)<br>MMSE = 25.7 (3.2)                    | N = 20<br>Ratio = 50.0%<br>Age = 74.5 (6.4)<br>Edu = 12.7 (3.7)<br>MMSE=24.5 (2.4)                      | EC: single memory training<br>CC: Passive (Usual Care)                     | 30 min per session<br>1 hour per day<br>2 sessions/week, 4 weeks.<br>Total = 4 hours | EC:3<br>CC:5<br>Total: 16%    | USMART program involving spaced retrieval-based memory training, using a self-administered application on an iPad tablet.                                                        | Week 0, 5<br>Follow-up (n/s)#                       | Yes                         |
| Herrera et al 2012  | N = 11<br>ratio = 54%<br>age = 75.1 (2.0)<br>Edu = 46% of secondary school or more<br>MMSE = 27.4 (0.5) | N = 11<br>ratio = 45%<br>age = 78.2 (1.4)<br>Edu = 63% of secondary school or more<br>MMSE = 27.2 (0.4) | EC: Multidomain<br>CC: Active                                              | 60 minute sessions, 2 days a week for 12 weeks.<br>Total = 24 hours                  | 0%                            | Several computer-based training exercises designed to improve memory and attention                                                                                               | 0, 12 weeks ± 15 days<br>Follow-up: at 24 weeks     | Yes                         |

| Author and Year   | Treatment Group N, % male, mean age, mean education, MMSE (SD)                            | Control Group N, ratio of male, mean age, mean education, MMSE (SD)                       | CCT type for EC and type of CC                                                         | Frequency, duration and total hours                                            | Drop-out (%)                   | Cognitive Training Intervention                                                                                                                                                          | Assessment interval (time pre or post intervention)                 | Include d for meta-analysis |
|-------------------|-------------------------------------------------------------------------------------------|-------------------------------------------------------------------------------------------|----------------------------------------------------------------------------------------|--------------------------------------------------------------------------------|--------------------------------|------------------------------------------------------------------------------------------------------------------------------------------------------------------------------------------|---------------------------------------------------------------------|-----------------------------|
| Hughes et al 2014 | N = 10<br>ratio = 20%<br>age = 78.5 (7.1)<br>Edu = 13.8 (2.4)<br>MMSE = 27.2 (1.9)        | N = 10<br>ratio = 40%<br>age = 76.2 (4.3)<br>Edu = 13.1 (1.9)<br>MMSE = 27.1 (1.8)        | EC:<br>Multidomain<br>CC: Active                                                       | 90 minute sessions, once a week for 24 weeks. Total = 36 hours                 | 0%                             | Group-based Nintendo Wii sports package. Group-based Interactive video gaming                                                                                                            | 0, 24 weeks<br>± 1 weeks<br>Follow-up: (n/s)                        | Yes                         |
| Hyer et al. 2016  | N = 34<br>ratio = 50%<br>age = 75.1 (7.4)<br>Edu = 70% secondary<br>MMSE = n/s            | N = 34<br>ratio = 44%<br>age = 75.2 (7.8)<br>Edu = 66% secondary<br>MMSE = n/s            | EC: Single domain (working memory)<br>CC: Active (Sham)                                | 25 days of 40 min sessions, completed over 5 to 7 weeks. Total = 16.7 hours    | EC: 4<br>CC: 5<br>Total: 11.7% | Cogmed – adaptive WM training                                                                                                                                                            | Before and after training<br>Follow-up: 3 months after intervention | Yes                         |
| Lin et al 2016    | N = 10<br>Ratio = 50.0%<br>Age = 72.9 (8.2)<br>Edu = 90.0% of college level<br>MMSE = n/s | N = 11<br>Ratio = 54.5%<br>Age = 73.1 (9.6)<br>Edu = 54.5% of college level<br>MMSE = n/s | EC: Single domain speed-of-processing<br>CC: active control(mental leisure activities) | 1 hour per day<br>4 days per week for 6 weeks in their homes. Total = 24 hours | EC:2<br>CC:1<br>Total: 12.5%   | INSIGHT online program: (vision-based speed-of-processing) which included five training tasks: eye for detail, peripheral challenge, visual sweeps, double decision, and target tracker. | Before and after training<br>Follow-up (n/s)#                       | Yes                         |

| Author and Year   | Treatment Group N, % male, mean age, mean education, MMSE (SD)                       | Control Group N, ratio of male, mean age, mean education, MMSE (SD)                | CCT type for EC and type of CC                                                                       | Frequency, duration and total hours                                    | Drop-out (%)                   | Cognitive Training Intervention                      | Assessment interval (time pre or post intervention)                 | Include d for meta-analysis |
|-------------------|--------------------------------------------------------------------------------------|------------------------------------------------------------------------------------|------------------------------------------------------------------------------------------------------|------------------------------------------------------------------------|--------------------------------|------------------------------------------------------|---------------------------------------------------------------------|-----------------------------|
| Optale et al 2010 | N = 15<br>ratio = 59.1%<br>age = 78.5 (10.9)<br>Edu = 5.3 (2.4)<br>MMSE = 22.9 (5.0) | N = 16<br>ratio = 31.25%<br>age = 81.6 (5.0)<br>Edu = 6 (3.5)<br>MMSE = 21.0 (4.8) | EC: Single domain - Memory<br>CC: Active                                                             | 30 minute sessions, 3 times a week for 3 months.<br>Total = 58.5 hours | EC: 3<br>CC: 2<br>Total: 16.1% | A Virtual Reality-based memory training programme    | Before and after training<br>Follow-up: 3 months after intervention | No**                        |
| Rosen et al 2011  | N = 6<br>ratio = n/s<br>age = 70.7 (10.6)<br>Edu = 16.7 (0.8)<br>MMSE = 29.3 (1.2)   | N = 6<br>ratio = n/s<br>age = 78.0 (7.9)<br>Edu = 18.3 (1.5)<br>MMSE = 27.8 (2.3)  | EC:<br>processing speed and accuracy in auditory processing<br>CC: computer-based activities(Active) | 100 minute sessions, 5 times a week for 8 weeks.<br>Total = 36 hours   | 0%                             | processing speed and accuracy in auditory processing | Before and after training<br>Follow-up (n/s)                        | Yes                         |

| Author and Year     | Treatment Group N, % male, mean age, mean education, MMSE (SD)                                         | Control Group N, ratio of male, mean age, mean education, MMSE (SD)                                    | CCT type for EC and type of CC                                        | Frequency, duration and total hours                                                    | Drop-out (%) | Cognitive Training Intervention                                                                | Assessment interval (time pre or post intervention)                           | Include d for meta-analysis |
|---------------------|--------------------------------------------------------------------------------------------------------|--------------------------------------------------------------------------------------------------------|-----------------------------------------------------------------------|----------------------------------------------------------------------------------------|--------------|------------------------------------------------------------------------------------------------|-------------------------------------------------------------------------------|-----------------------------|
| Rozzini et al 2007  | N = 15<br>ratio = n/s<br>age = 63 - 78<br>Edu = n/s<br>MMSE = 26.0 (1.6)                               | N = 22<br>ratio = n/s<br>age = 63 - 78<br>Edu = n/s<br>MMSE = 26.4 (1.9)                               | EC:<br>Multidomain and medication<br>CC:<br>Medication only (Passive) | 60 minute session, 5 days a week for 4 weeks in 3 discrete blocks.<br>Total = 60 hours | 0%           | Cognitive exercises based on Neuropsychology Training combined with a cholinesterase inhibitor | Before and after training<br>Follow-up (n/s)                                  | Yes                         |
| Savulich et al 2017 | N = 21<br>Ratio = 52.4%<br>Age = 75.2 (7.4)<br>Edu = 15.9 (1.3) (Age left school)<br>MMSE = 26.6 (2.9) | N = 21<br>Ratio = 66.7%<br>Age = 76.9 (8.3)<br>Edu = 16.0 (2.1) (Age left school)<br>MMSE = 26.8 ± 2.2 | EC: a novel memory game<br>CC: negative (clinic visits as usual)      | 1 hour per session, 8 hours within 4 weeks.<br>Total = 8 hours.                        | 0 %          | Gameshow program: Computer-based episodic memory training.                                     | At a maximum of 4 weeks after the baseline testing session<br>Follow-up (n/s) | Yes                         |

Notes: MMSE: Mini Mental State Examination, SD: Standard deviation, n/s: not stated, EC: Experimental condition, CC: Control condition. \*Excluded from meta-analysis due to immediate cognitive outcomes not stated, \*\* Excluded from meta-analysis due to suspected inclusion of individuals with AD.

## Supplementary Appendix 1

### Statistical methods

#### Effect size calculation

Effect sizes were calculated using RevMan software version 5.3. Standardised mean differences were calculated using Hedges' adjusted  $g^1$ . Pre-intervention standard deviations were used as these are most likely to be comparable across studies and therefore provide the most accurate estimate of effect size.<sup>3</sup>

The Hedges' adjusted  $g$  formula used in RevMan is as follows:

$$g = [M_{\text{post intervention}} - M_{\text{post control}} / SD_{\text{pre-pooled}}] * [1 - 3/(4N-9)]$$

Where  $N = n_{\text{intervention group}} + n_{\text{control group}}$

and

$$SD_{\text{pre-pooled}} = \sqrt{[(n_{\text{intervention}}-1) SD_{\text{pre intervention}}^2 + (n_{\text{control}}-1) SD_{\text{pre control}}^2] / (N-2)}$$

## **Meta-analyses**

Meta-analyses were performed using RevMan software version 5.3. A random effects method as described by DeSirmonian and laird<sup>4</sup> was used, adjusting standard errors of the effect sizes in each study to account for the heterogeneity for intervention effects observed between different studies.

The pooled effect size of each meta-analysis was calculated by attributing a weight to the average effect size in each study according to sample size. The z statistic was used to evaluate whether the pooled effect size was significantly different to no effect.

Heterogeneity was quantified using the  $I^2$  statistic.

## **Composite measure calculation**

Composite scores were calculated where a study reported multiple outcomes falling within a particular outcome domain (e.g. objective cognitive performance). This approach was pragmatic in allowing one score to represent each intervention in the meta-analysis regardless of the number of outcomes reported. In turn this prevents more weight being given to studies with multiple outcomes.<sup>2</sup>The variance of the sum of variables was calculated as described below.

Using the example of a study with two relevant outcomes, there will be two effect sizes, namely  $y_1$  and  $y_2$ . The overall mean effect size for the composite measure will be:

$$\bar{y} = 1/2(y_1 + y_2)$$

The variance of this mean is calculated as follows:

$$V_{\bar{y}} = \frac{1}{4} (V_{y1} + V_{y2} + 2r \sqrt{V_{y1}} \sqrt{V_{y2}}),$$

where  $r$  is the correlation coefficient describing to what extent  $y_1$  and  $y_2$  co-vary.

If the correlation is set at 0, the outcomes are essentially treated as independent of each other and if the correlation is set at 1, the variance is an average of each outcome's variance. The former will lead to an underestimate of the variance and overestimate of precision while the latter will have the opposite effect. Consequently, in the absence of existing literature to identify a suitable correlation, we reported composite effect sizes calculated using a correlation of 0.5.

1. Hedges LV, Olkin I. Statistical methods for meta-analysis. New York, Academic Press 1985.
2. Borenstein M, Hedges LV, Higgins JPT, et al. Introduction to Meta-Analysis. Chichester, John Wiley & Sons, Ltd 2009.
3. Morris S. Estimating Effect Sizes From Pretest-Posttest-Control Group Designs. Organ. Res. Meth 2008;11 (2):364-386.
4. DerSimonian R, Laird N. Meta-analysis in clinical trials. Control Clin Trials 1986; 7(3):177-188
