# Supplementary material
Source: HighWire-hosted journal article supplement (https://bmjopen.bmj.com/content/9/8/e027062)
Supplement: inline-supplementary-material-2 [file inline-supplementary-material-2.pdf]

Supplement to: Zhang H, Huntley J, et al. The efficacy of Computerized Cognitive Training on cognitive outcomes in Mild Cognitive Impairment: A Systematic Review and Meta-Analysis.

Supplementary Figure 1 Summary of risk of bias for included studies

Supplementary Figure 2 Funnel plot demonstrating bias of CCT on global cognitive function

Supplementary Figure 3 Forest plot demonstrating efficacy of CCT on global cognition stratified by the type of control group

Supplementary Figure 4 Funnel plot demonstrating bias of CCT on global cognition stratified by the type of control group

Supplementary Figure 5 Funnel plot demonstrating bias of CCT on memory, working memory and executive function

Supplementary Figure 6 Forest plot demonstrating efficacy of CCT on memory stratified by the type of control group

Supplementary Figure 7 Funnel plot demonstrating bias of CCT on memory stratified by the type of control group

Supplementary Figure 8 Forest plot demonstrating efficacy of CCT on executive function stratified by the type of control group

Supplementary Figure 9 Funnel plot demonstrating bias of CCT on executive cognition stratified by the type of control group

Supplementary Figure 10 Forest plot demonstrating efficacy of CCT on memory stratified by single memory domain or multi-domain intervention

Supplementary Figure 11 Funnel plot demonstrating bias of CCT on memory stratified by single memory domain or multi-domain intervention

Supplementary Figure 12 Forest plot demonstrating efficacy of CCT on global cognition stratified by dose of the intervention

Supplementary Figure 13 Funnel plot demonstrating bias of CCT on global cognition stratified by dose of the intervention

A.

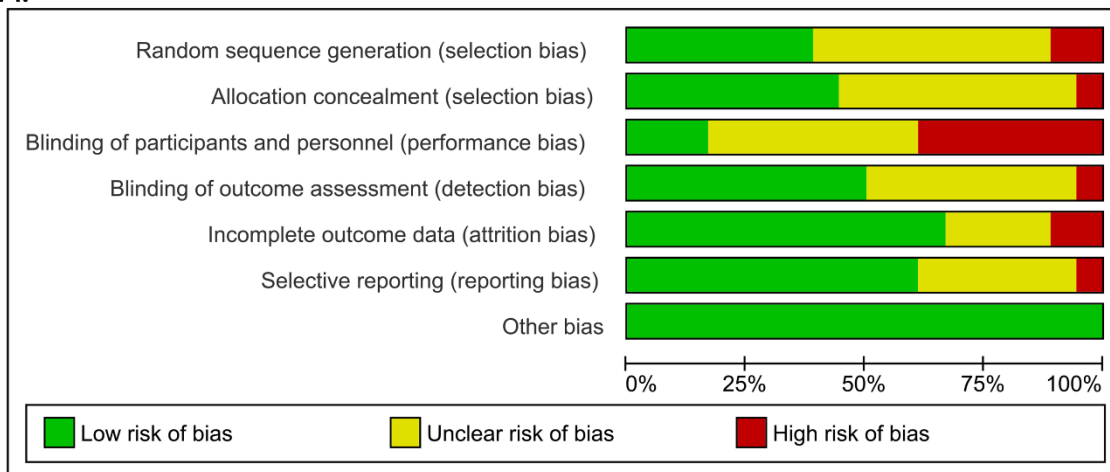

B.

| Study                | Random sequence generation (selection bias) | Allocation concealment (selection bias) | Blinding of participants and personnel (performance bias) | Blinding of outcome assessment (detection bias) | Incomplete outcome data (attrition bias) | Selective reporting (reporting bias) | Other bias |
|----------------------|---------------------------------------------|-----------------------------------------|-----------------------------------------------------------|-------------------------------------------------|------------------------------------------|--------------------------------------|------------|
| Barban 2016          | ?                                           | ?                                       | ?                                                         | ?                                               | ?                                        | ?                                    | ?          |
| Charmelle 2015       | ?                                           | ?                                       | ?                                                         | ?                                               | ?                                        | ?                                    | ?          |
| Diabekhir 2017       | ?                                           | ?                                       | ?                                                         | ?                                               | ?                                        | ?                                    | ?          |
| Flarone Singh 2014   | ?                                           | ?                                       | ?                                                         | ?                                               | ?                                        | ?                                    | ?          |
| Finn 2011            | ?                                           | ?                                       | ?                                                         | ?                                               | ?                                        | ?                                    | ?          |
| Finn 2015            | ?                                           | ?                                       | ?                                                         | ?                                               | ?                                        | ?                                    | ?          |
| Gagnon 2012          | ?                                           | ?                                       | ?                                                         | ?                                               | ?                                        | ?                                    | ?          |
| Gooding 2016 study 1 | ?                                           | ?                                       | ?                                                         | ?                                               | ?                                        | ?                                    | ?          |
| Gooding 2016 study 2 | ?                                           | ?                                       | ?                                                         | ?                                               | ?                                        | ?                                    | ?          |
| Hagovsk 2016         | ?                                           | ?                                       | ?                                                         | ?                                               | ?                                        | ?                                    | ?          |
| Han 2017             | ?                                           | ?                                       | ?                                                         | ?                                               | ?                                        | ?                                    | ?          |
| Herrera 2012         | ?                                           | ?                                       | ?                                                         | ?                                               | ?                                        | ?                                    | ?          |
| Hughes 2014          | ?                                           | ?                                       | ?                                                         | ?                                               | ?                                        | ?                                    | ?          |
| Hyet 2016            | ?                                           | ?                                       | ?                                                         | ?                                               | ?                                        | ?                                    | ?          |
| Lin 2016             | ?                                           | ?                                       | ?                                                         | ?                                               | ?                                        | ?                                    | ?          |
| Rosen 2011           | ?                                           | ?                                       | ?                                                         | ?                                               | ?                                        | ?                                    | ?          |
| Rozzini 2007         | ?                                           | ?                                       | ?                                                         | ?                                               | ?                                        | ?                                    | ?          |
| Savulich 2017        | ?                                           | ?                                       | ?                                                         | ?                                               | ?                                        | ?                                    | ?          |

Supplementary Figure 1 (A-B). Summary of risk of bias for included studies. (A). Risk of bias graph: review authors' judgements about each risk of bias item presented as percentages across all included studies. (B). Risk of bias summary: review authors' judgements about each risk of bias item for each included study.

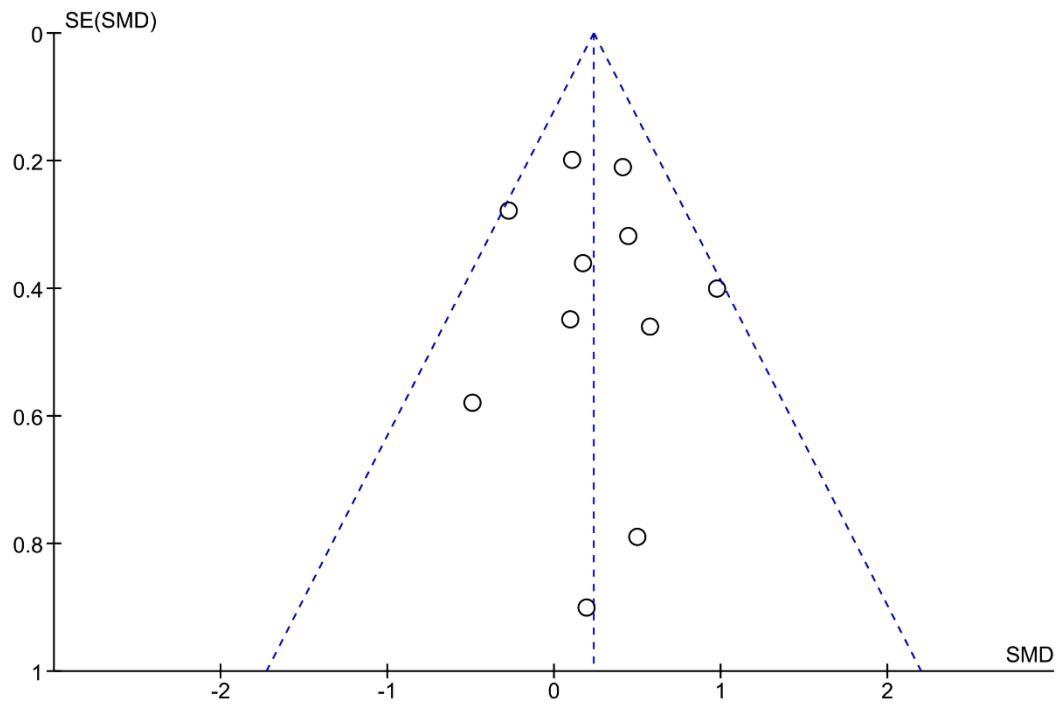

Supplementary Figure 2. Funnel plot demonstrating bias of CCT on global cognitive function

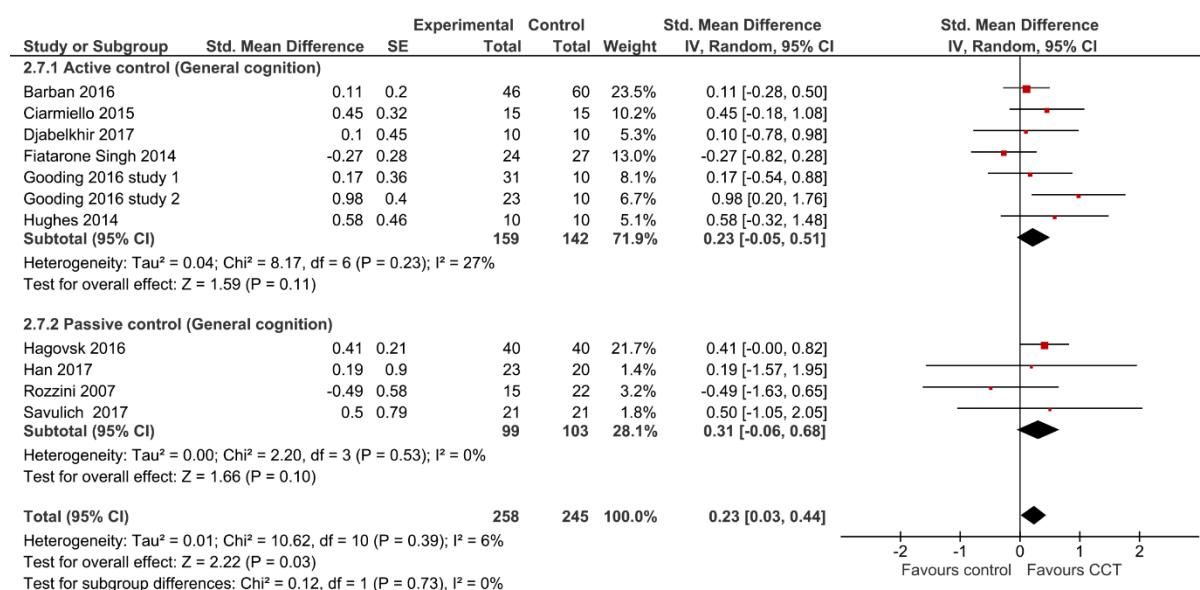

Supplementary Figure 3. Forest plot demonstrating efficacy of CCT on global cognition stratified by the type of control group

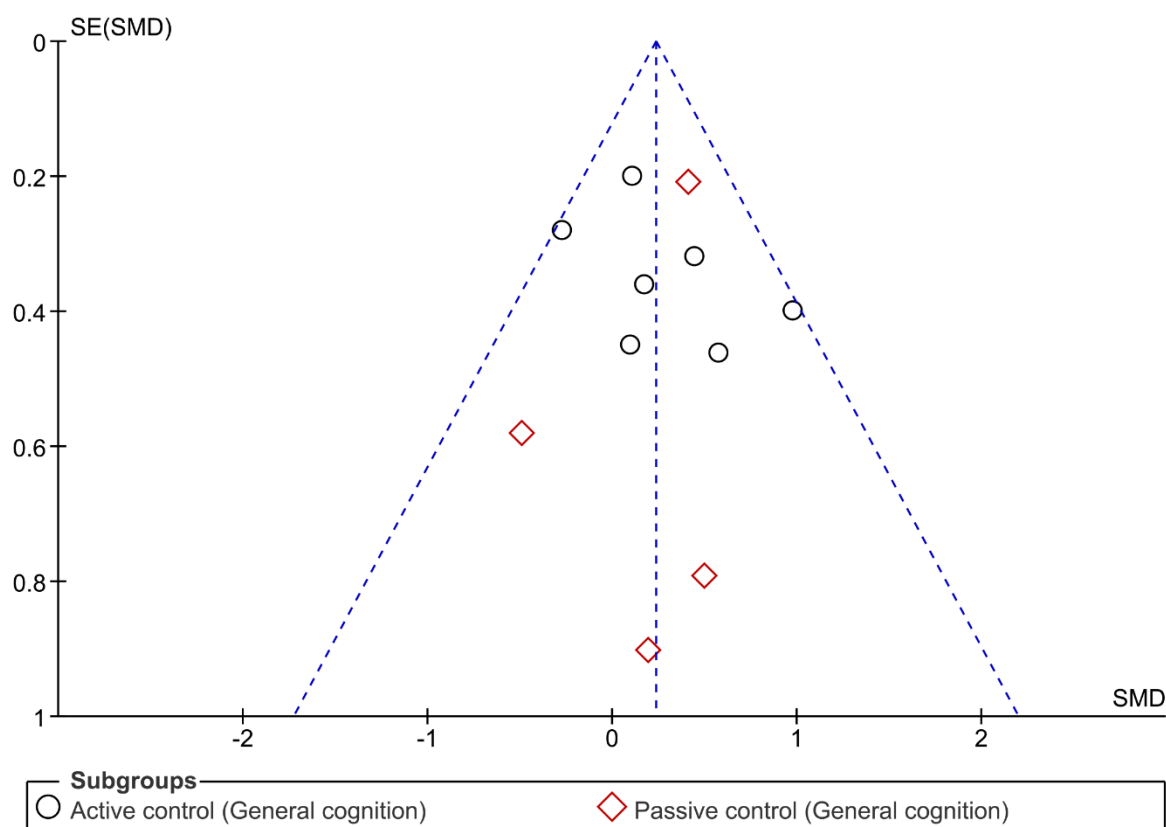

Supplementary Figure 4. Funnel plot demonstrating bias of CCT on global cognition stratified by the type of control group

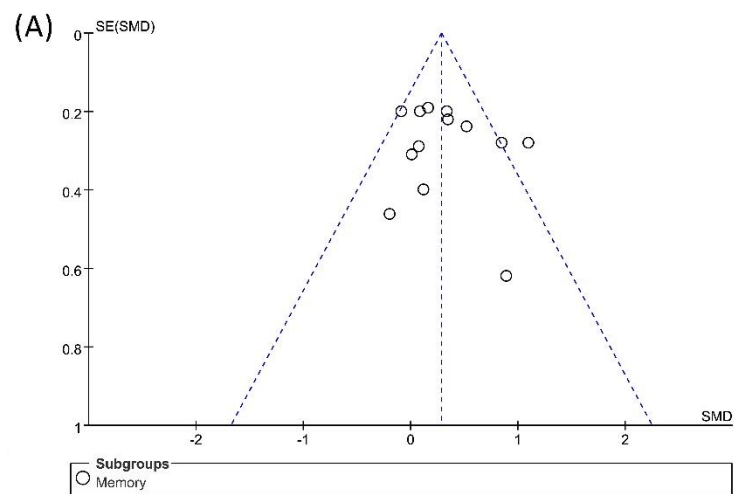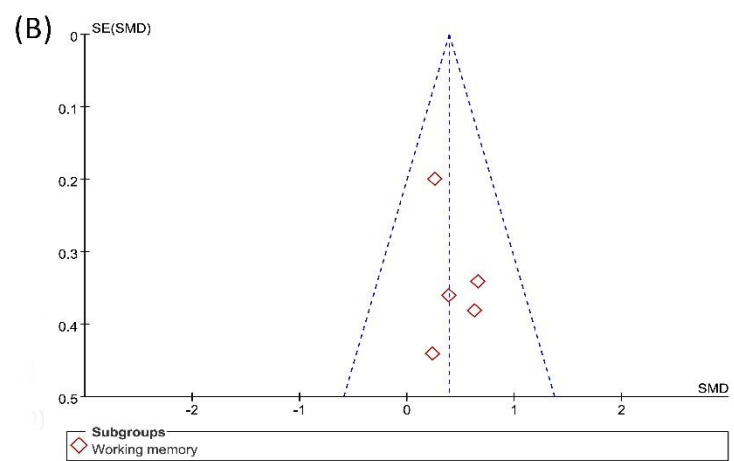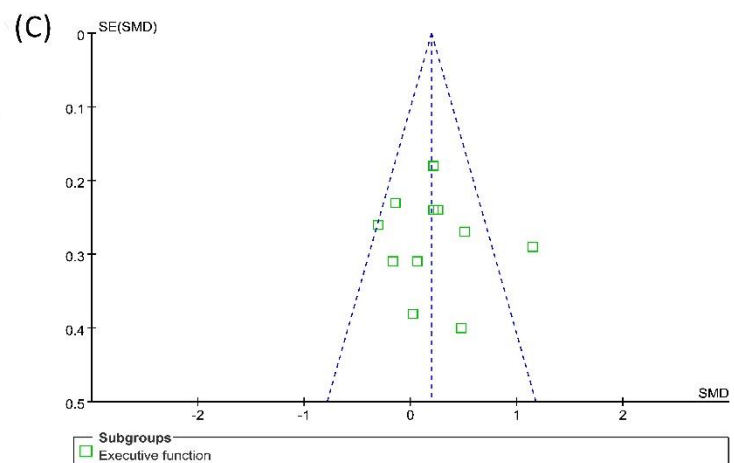

Supplementary Figure 5. Funnel plot demonstrating bias of CCT on memory (A), working memory (B) and executive function (C)

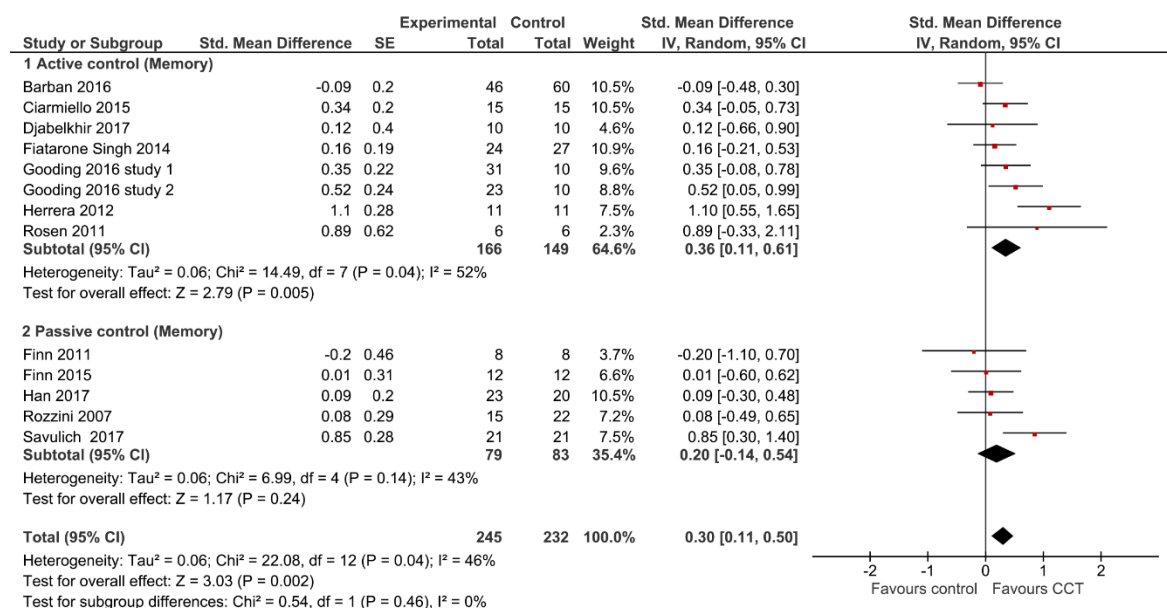

Supplementary Figure 6. Forest plot demonstrating efficacy of CCT on memory stratified by the type of control group

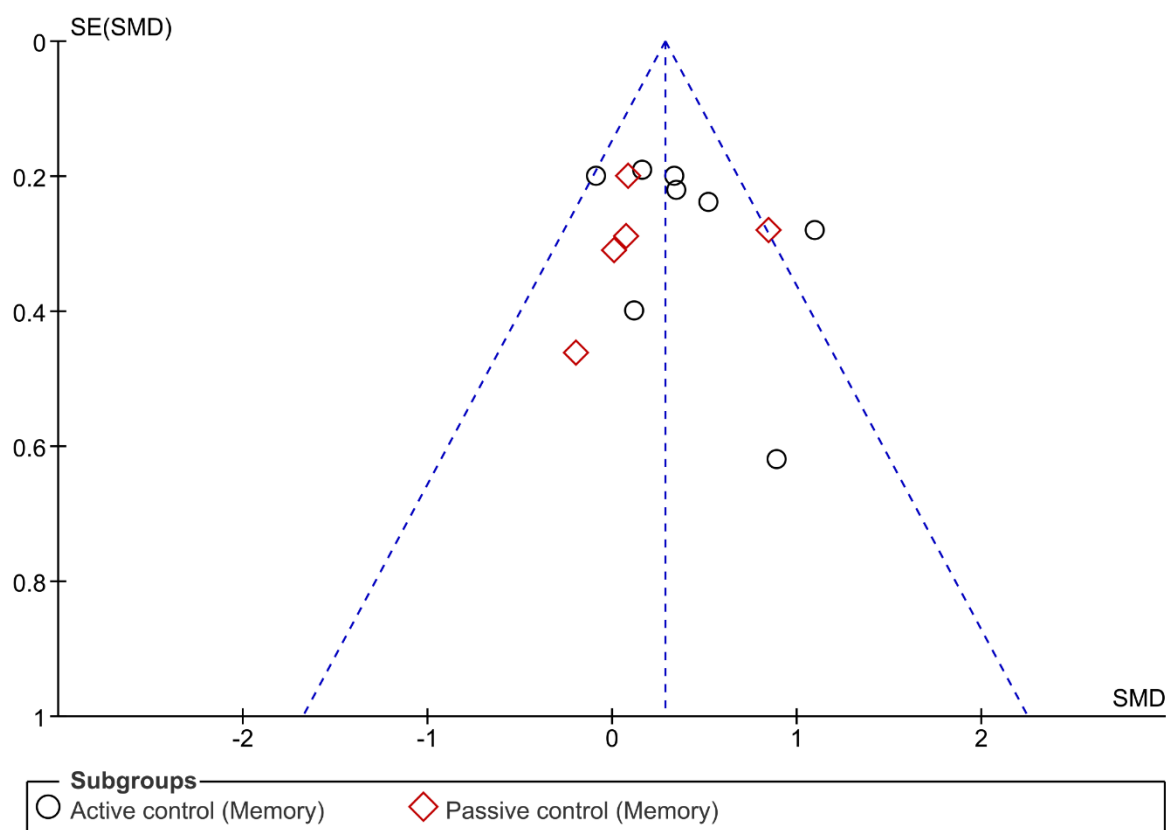

Supplementary Figure 7. Funnel plot demonstrating bias of CCT on memory stratified by the type of control group

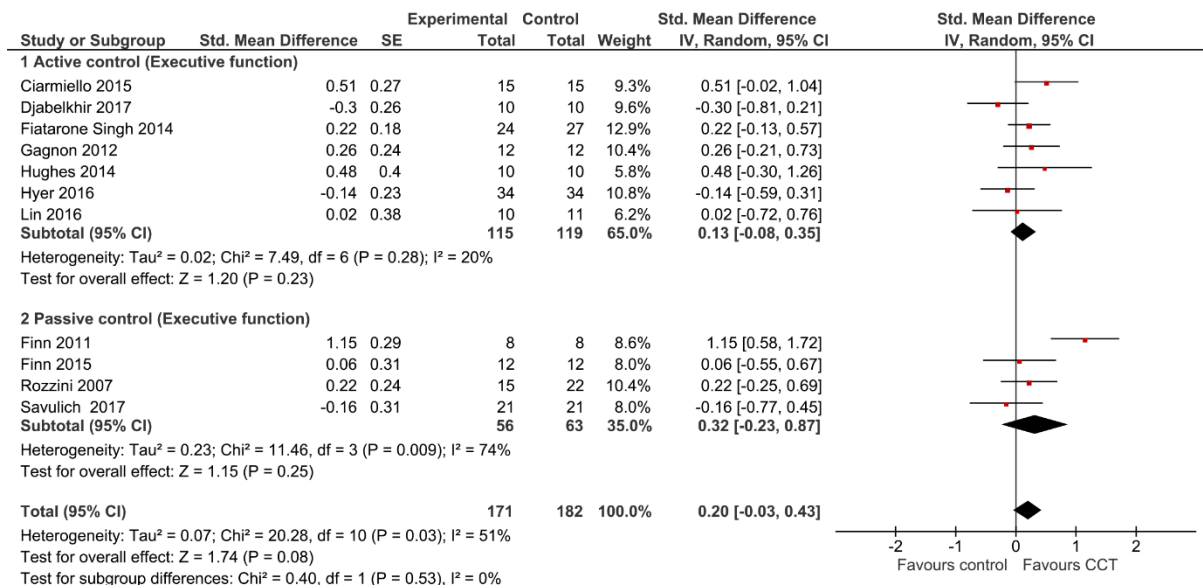

Supplementary Figure 8. Forest plot demonstrating efficacy of CCT on executive function stratified by the type of control group

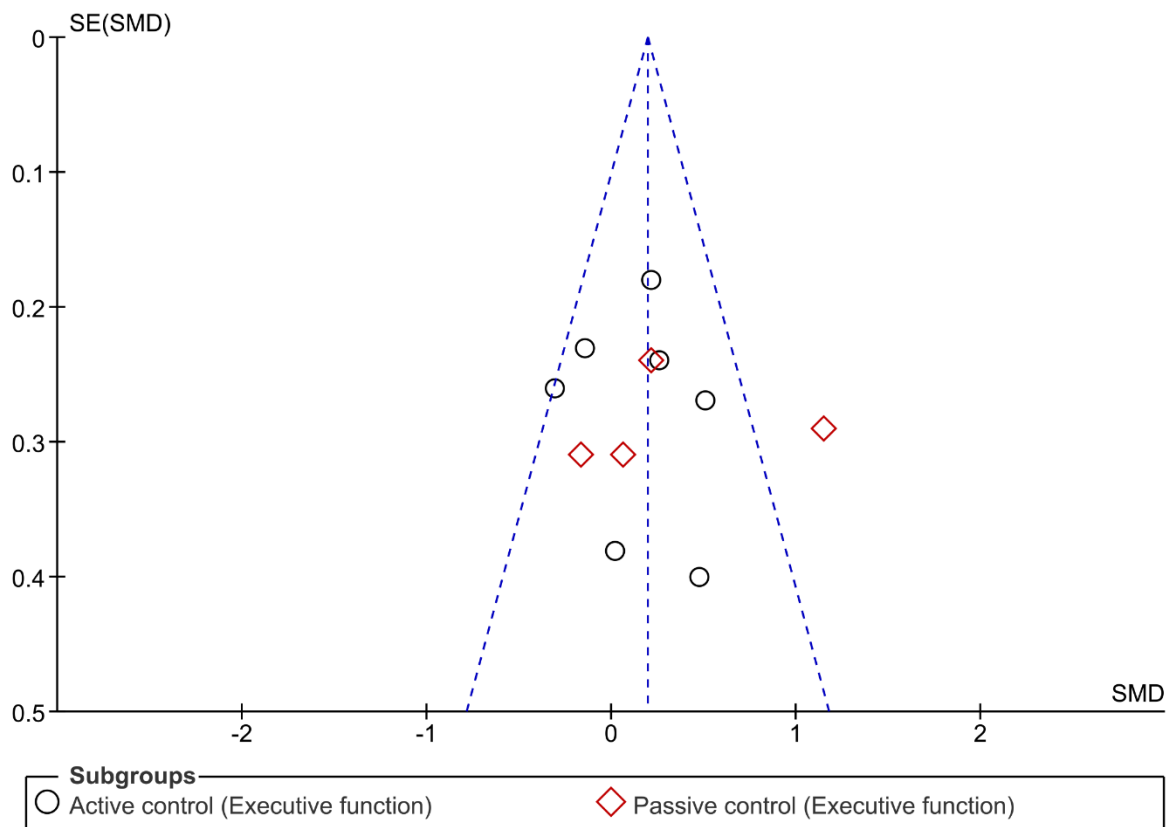

Supplementary Figure 9. Funnel plot demonstrating bias of CCT on executive cognition stratified by the type of control group

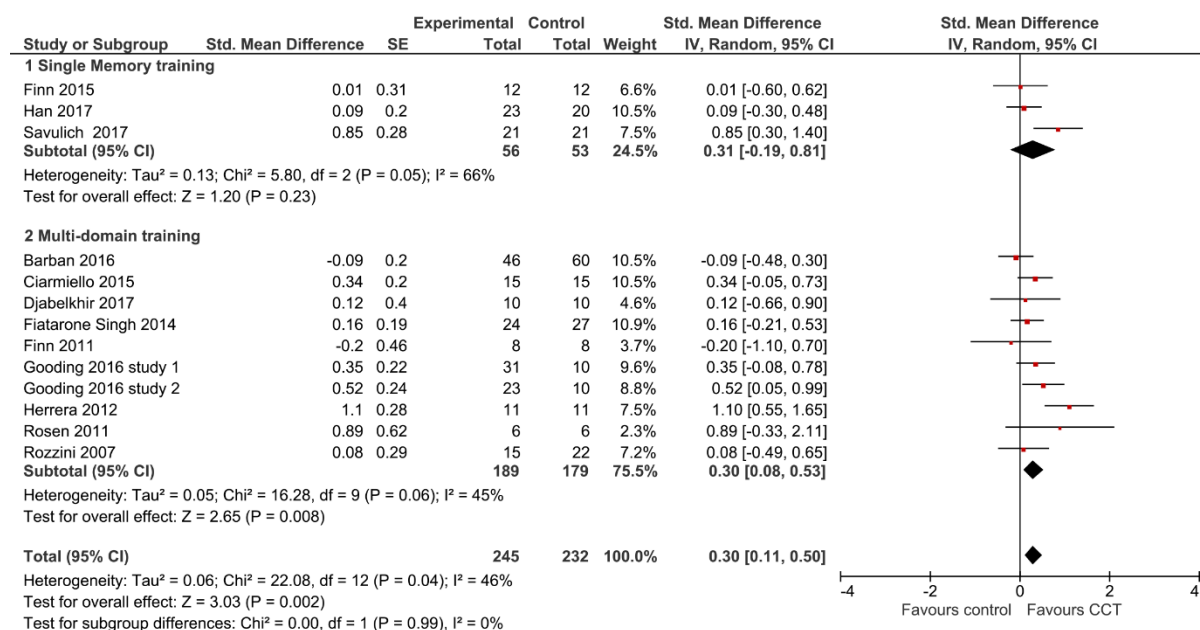

Supplementary Figure 10 Forest plot demonstrating efficacy of CCT on memory stratified by single memory domain or multi-domain intervention

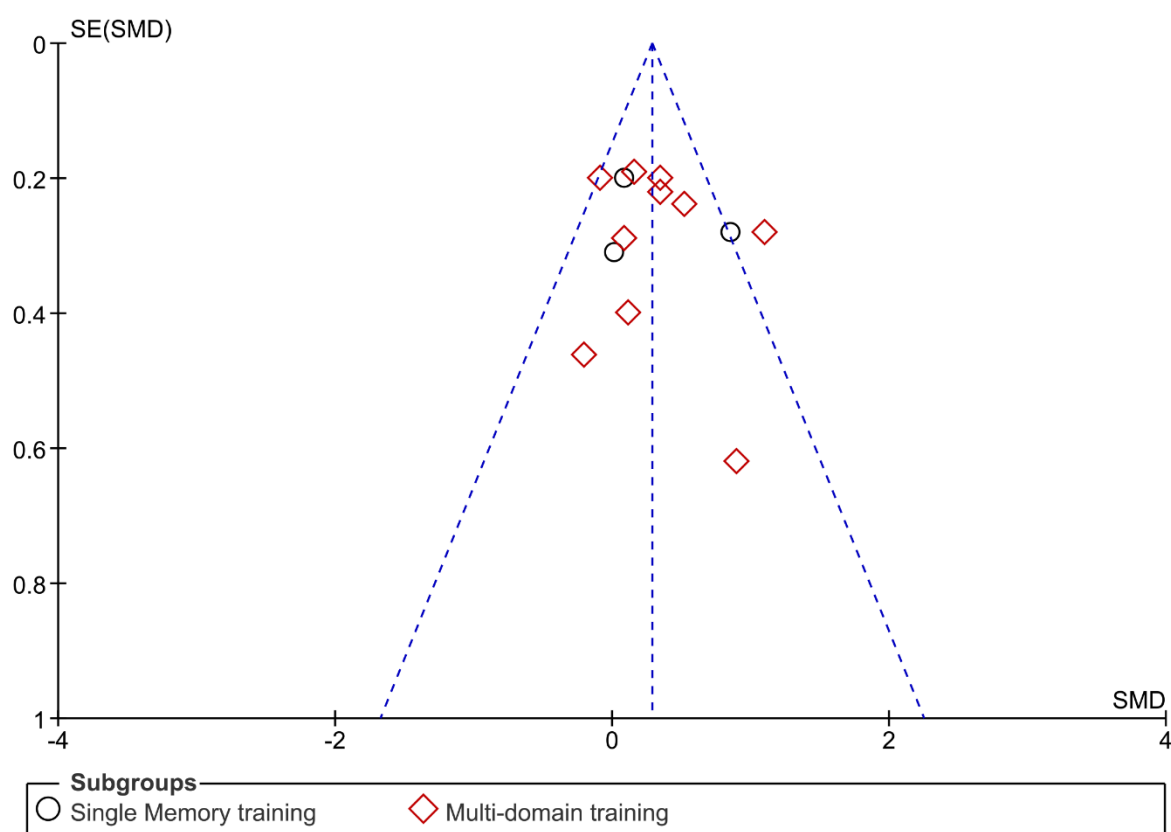

Supplementary Figure 11 Funnel plot demonstrating bias of CCT on memory stratified by single memory domain or multi-domain intervention

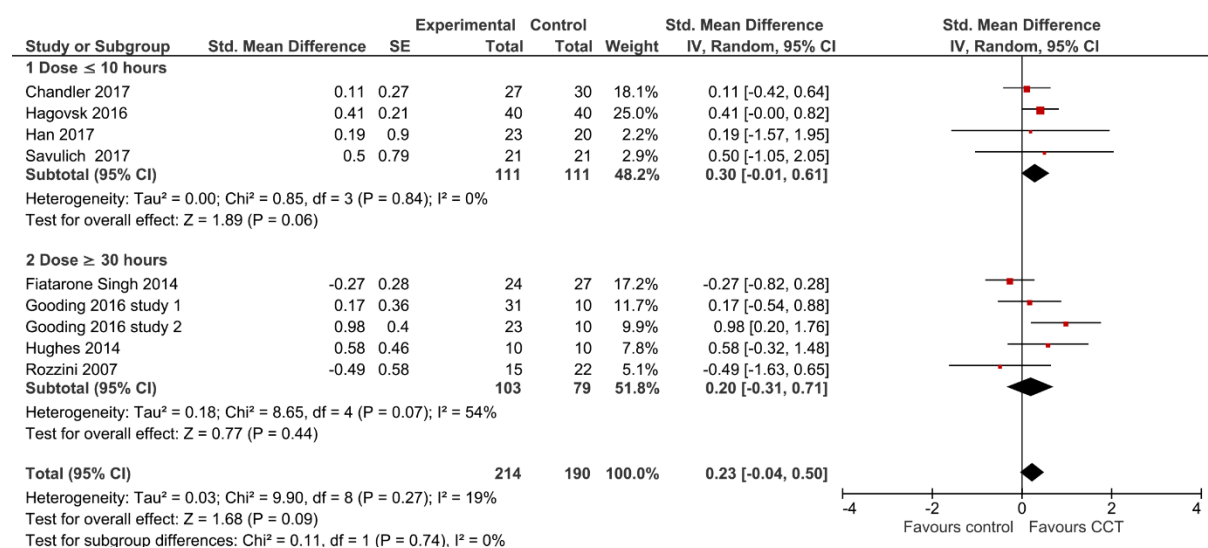

Supplementary Figure 12 Forest plot demonstrating efficacy of CCT on global cognition stratified by dose of the intervention

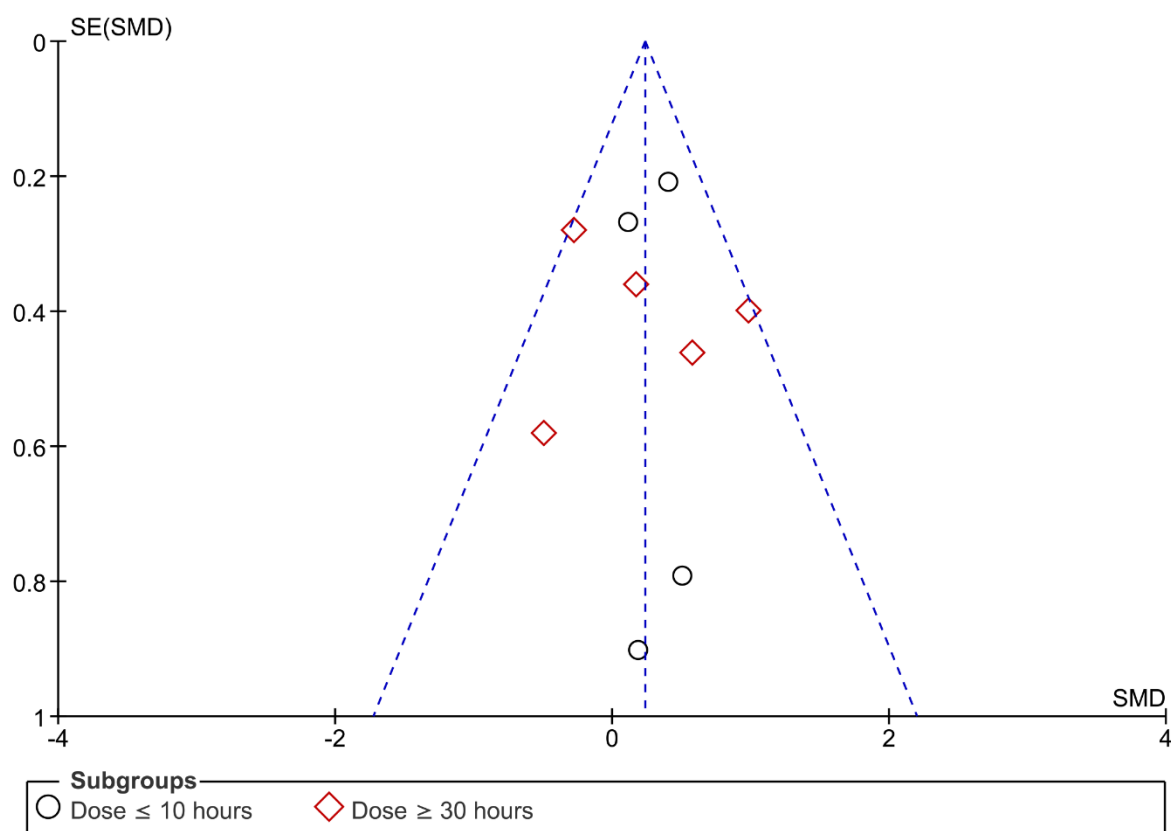

Supplementary Figure 13 Funnel plot demonstrating bias of CCT on global cognition stratified by dose of the intervention
